# Supplementary material for: Plasmodium parasite exploits host aquaporin-3 during liver stage malaria infection
Source: PubMed Central journal article supplement (PMC5979039; doi:10.1371/journal.ppat.1007057), 2018-05-18
Supplement: ppat.1007057.s008.pdf [file ppat.1007057.s008.pdf]

S1 Table. siRNAs used for depletion of aquaporin genes expressed in hepatocytes and primers used for qRT-PCR. Product names are for Dharmacon (scramble and SR-B1) or Qiagen (all AQP siRNAs).

| NCBI gene | mRNA Accessions     | siRNA Target Sequence  | Product Name   |
|-----------|---------------------|------------------------|----------------|
| scramble  | non-targetting      | TACATAACCGGACATAATC    | D-001210-04-05 |
| SR-B1     | NM_005505           | ACTGACCGGACGTGGGATT    | D-010592-03*   |
| SR-B1     | NM_005505           | CCTGTTTGACCCCTTCTAAG   | D-010592-04*   |
| AQP3      | NM_004925           | CTGGATGTACATACATAAGTA  | Hs_AQP3_2 *    |
| AQP3      | NM_004925           | CTGGATCAAGCTGCCCATCTA  | Hs_AQP3_3 *    |
| AQP3      | NM_004925           | ACCGGAATTTGGGTCAATACA  | Hs_AQP3_5      |
| AQP3      | NM_004925           | AGCCGGCATCTTTGCTACCTA  | Hs_AQP3_7      |
| AQP4      | NM_001650 NM_004028 | CTGGTTGAGTTGATAATCACA  | Hs_AQP4_3      |
| AQP4      | NM_001650 NM_004028 | GACGGATGACCTGATTCTAAA  | Hs_AQP4_4      |
| AQP4      | NM_001650 NM_004028 | ACCGGTCGACATGGTTCTCAT  | Hs_AQP4_5      |
| AQP4      | NM_001650 NM_004028 | CAGGAAGATCAGCATCGCCAA  | Hs_AQP4_6      |
| AQP6      | NM_001652 NM_053286 | CAGGGACTGCTGTGAAATCAA  | Hs_AQP6_2      |
| AQP6      | NM_001652 NM_053286 | TTCAGTGCCTCTGAAAGACTA  | Hs_AQP6_5      |
| AQP6      | NM_001652 NM_053286 | CCTGGCCTCACTGATCTACAA  | Hs_AQP6_6      |
| AQP6      | NM_001652           | TGGGATCAACGTGGTCCGGAA  | Hs_AQP6_7      |
| AQP7      | NM_001170           | CTGGAGGAAGTTTCCGGTCTA  | Hs_AQP7_3      |
| AQP7      | NM_001170           | CGGGATAACCGTATTGCCCAA  | Hs_AQP7_4      |
| AQP7      | NM_001170           | CACATATGTCATGATGGTATT  | Hs_AQP7_5      |
| AQP7      | NM_001170           | CGCAGCTGTGACCTTTGCTAA  | Hs_AQP7_6      |
| AQP8      | NM_001169           | CTGACAATTCTCACTTTGCAA  | Hs_AQP8_1      |
| AQP8      | NM_001169           | GAGCGTGTTCCTTGAGAGGAA  | Hs_AQP8_2      |
| AQP8      | NM_001169           | ATCCTGATGTCTGGAGAGATA  | Hs_AQP8_5      |
| AQP8      | NM_001169           | TCCGATGTTTGTGCCATCTGA  | Hs_AQP8_6      |
| AQP9      | NM_020980           | CAGCCTCTAATTGGAACGGCA  | Hs_AQP9_1      |
| AQP9      | NM_020980           | ACGACTGTGCTTGTCCATTAT  | Hs_AQP9_2      |
| AQP9      | NM_020980           | AACCGTCTTTGGCATTACTA   | Hs_AQP9_4      |
| AQP9      | NM_020980           | CACGTTTCATCTTGATTGTCTT | Hs_AQP9_5      |
| AQP11     | NM_173039           | CTGGCTCCTTCTTTAGGTATA  | Hs_AQP11_4     |
| AQP11     | NM_173039           | CTGCATAACAACCATAACAATT | Hs_AQP11_5     |
| AQP11     | NM_173039           | CGAGAGGAGCTTCGCTTGCAA  | Hs_AQP11_6     |
| AQP11     | NM_173039           | CTGGACGCTGACGCTCGTCTA  | Hs_AQP11_7     |

| Gene    | Primer Sequence         |
|---------|-------------------------|
| SR-B1_F | TCTCTCCGTCTACTTCTTTGACG |
| SR-B1_R | AACTGGAAGGTGCGGTACTC    |
| AQP3_F  | ACCAGCTTTTGTTCGGGC      |
| AQP3_R  | ACACGATAAGGGAGGCTGTG    |
| AQP4_F  | GCCATCATTGGAGCAGGAATCC  |
| AQP4_R  | ACTCAACCAGGAGACCATGACC  |
| AQP6_F  | CTGCTTCTGACCCTGCAGC     |
| AQP6_R  | GGCCCCACCCAGAAGACC      |
| AQP8_F  | GGGCAGAGCCCATAGTGTGA    |
| AQP8_R  | AGGGTTGAAGTGTCCACCAC    |
| AQP7_F  | GAGGAAGATGGTGCGAGAGTTC  |
| AQP7_R  | GAGGAAGATGGTGCGAGAGTTC  |
| AQP9_F  | TCTCTGAGTTCTTGGGCACG    |
| AQP9_R  | GGTTGATGTGACCACCAGAG    |
| AQP11_F | CACTTCCAGGAAGTCCGAACCA  |
| AQP11_R | GTAGCGAAAGTGCCAAAGCTGG  |

\*indicates siRNAs used for pooled siRNA gene depletion in Fig 3A.
