# Supplementary material for: Plasmodium parasite exploits host aquaporin-3 during liver stage malaria infection
Source: PubMed Central journal article supplement (PMC5979039; doi:10.1371/journal.ppat.1007057), 2018-05-18
Supplement: ppat.1007057.s009.pdf [file ppat.1007057.s009.pdf]

S2 Table. Parasite load, cell viability, and relative mRNA expression of targeted genes in HuH7 cells treated with individual siRNAs and infected with *P. berghei*.

| Qiagen siRNA | Parasite Load (%) |         |         | Cell Viability (%) |         |         | Relative mRNA |
|--------------|-------------------|---------|---------|--------------------|---------|---------|---------------|
|              | (Mean +/- SEM)    | Summary | P value | (Mean +/- SEM)     | Summary | P value | %             |
| scramble     | 100 ± 0.0         |         |         | 100 ± 0.0          |         |         | 100.00        |
| SR-BI-3 †    | 8.59 ± 3.00       | ****    | 0.0001  | 111.9 ± 9.75       | ns      | 0.999   | 3.45          |
| SR-BI-4 †    | 22.52 ± 6.48      | ****    | 0.0001  | 110.52 ± 10.68     | ns      | 0.9991  | 3.08          |
| AQP3-2 †     | 24.03 ± 6.046     | ***     | 0.0002  | 84.60 ± 5.31       | ns      | 0.9946  | 5.69          |
| AQP3-3 †     | 37.37 ± 3.84      | **      | 0.0046  | 95.72 ± 11.72      | ns      | 0.9997  | 6.65          |
| AQP3-5       | 38.93 ± 3.11      | **      | 0.0063  | 85.64 ± 20.15      | ns      | 0.9988  | 14.06         |
| AQP3-7       | 61.88 ± 5.17      | ns      | 0.273   | 66.10 ± 4.11       | ns      | 0.5947  | 10.37         |
| AQP4-3       | 44.41 ± 2.30      | *       | 0.0187  | 82.35 ± 4.34       | ns      | 0.994   | 22.38         |
| AQP4-4 †     | 138.13 ± 12.14    | ns      | 0.2728  | 82.69 ± 13.95      | ns      | 0.9942  | 4.92          |
| AQP4-5 †     | 90.12 ± 11.91     | ns      | 0.9991  | 123.51 ± 11.97     | ns      | 0.9565  | 8.48          |
| AQP4-6       | 102.48 ± 14.97    | ns      | 0.9998  | 126.62 ± 28.24     | ns      | 0.8832  | 9.31          |
| AQP6-2 †     | 97.91 ± 26.41     | ns      | 0.9999  | 73.72 ± 2.51       | ns      | 0.8239  | 6.47          |
| AQP6-5       | 40.80 ± 4.44      | **      | 0.0093  | 100.85 ± 18.58     | ns      | 0.9999  | 29.12         |
| AQP6-6       | 44.50 ± 18.51     | *       | 0.019   | 92.75 ± 8.81       | ns      | 0.9994  | -             |
| AQP6-7 †     | 165.32 ± 28.59    | **      | 0.0026  | 86.02 ± 15.78      | ns      | 0.9987  | 16.90         |
| AQP7-3       | 44.94 ± 5.52      | **      | 0.004   | 81.33 ± 9.53       | ns      | 0.9863  | 80.94         |
| AQP7-4 †     | 34.14 ± 4.71      | ***     | 0.0002  | 91.65 ± 18.34      | ns      | 0.9993  | 13.63         |
| AQP7-5 †     | 36.47 ± 7.15      | **      | 0.0038  | 83.31 ± 7.50       | ns      | 0.9938  | 31.10         |
| AQP7-6       | 37.26 ± 5.84      | **      | 0.0045  | 87.63 ± 25.6       | ns      | 0.999   | 34.27         |
| AQP8-1       | 152.87 ± 25.29    | *       | 0.0306  | 100.23 ± 7.82      | ns      | 0.9999  | 731.07        |
| AQP8-2 †     | 100.28 ± 4.578    | ns      | 0.9999  | 95.20 ± 8.30       | ns      | 0.9996  | 10.05         |
| AQP8-5 †     | 86.24 ± 26.82     | ns      | 0.9987  | 91.08 ± 11.15      | ns      | 0.9993  | 28.22         |
| AQP8-6       | 77.03 ± 8.49      | ns      | 0.9159  | 84.61 ± 12.71      | ns      | 0.9946  | 84.38         |
| AQP9-1       | 57.36 ± 10.25     | ns      | 0.0594  | 83.82 ± 10.36      | ns      | 0.9941  | 32.76         |
| AQP9-2 †     | 42.78 ± 13.07     | **      | 0.0024  | 77.38 ± 10.05      | ns      | 0.9394  | 18.24         |
| AQP9-4 †     | 30.81 ± 4.83      | ****    | 0.0001  | 73.84 ± 8.31       | ns      | 0.8285  | 7.03          |
| AQP9-5       | 96.40 ± 15.27     | ns      | 0.9997  | 90.01 ± 7.93       | ns      | 0.9992  | 23.73         |
| AQP11-4 †    | 47.59 ± 8.50      | *       | 0.0332  | 113.19 ± 17.88     | ns      | 0.9988  | 4.22          |
| AQP11-5 †    | 99.43 ± 17.82     | ns      | 0.9999  | 132.52 ± 15.78     | ns      | 0.543   | 7.80          |
| AQP11-6      | 89.00 ± 5.98      | ns      | 0.999   | 78.44 ± 9.11       | ns      | 0.9603  | 10.26         |
| AQP11-7      | 80.63 ± 5.57      | ns      | 0.9833  | 81.26 ± 5.85       | ns      | 0.9861  | 14.21         |

† Data for siRNA shown in main text
