# Supplementary material for: Plasmodium parasite exploits host aquaporin-3 during liver stage malaria infection
Source: PubMed Central journal article supplement (PMC5979039; doi:10.1371/journal.ppat.1007057), 2018-05-18
Supplement: ppat.1007057.s010.pdf [file ppat.1007057.s010.pdf]

Table S3. List of gRNAs used for generating AQP3mut cell line using the CRISPR/Cas9 genome editing technology.

|                     | gRNA1                      | gRNA2                     | Exon Targetted |
|---------------------|----------------------------|---------------------------|----------------|
| AQP <sup>mut1</sup> | caccgAAAGCCAAAGGCCAGGTTGA  | caccgACTCTGGGCATCCTCATCGC | 2              |
| AQP <sup>mut2</sup> | caccgGGCGGCGCTGTCGGGCGGGC  | GCCATGGGTTCGACAGA         | 1              |
| AQP <sup>mut3</sup> | caccgAGATGCTCCACATCCGCTACc | ×                         | 1              |
| AQP <sup>mut4</sup> | caccgAAAGCCAAAGGCCAGGTTGA  | caccgACTCTGGGCATCCTCATCGC | 2              |
