# Supplementary material for: Plasmodium parasite exploits host aquaporin-3 during liver stage malaria infection
Source: PubMed Central journal article supplement (PMC5979039; doi:10.1371/journal.ppat.1007057), 2018-05-18
Supplement: ppat.1007057.s011.pdf [file ppat.1007057.s011.pdf]

S4 Table. RNA-seq summary data.

| ID        | Cell line | Time points * | controls   | Total Reads | Mapped<br><i>H. sapiens</i> (%) |
|-----------|-----------|---------------|------------|-------------|---------------------------------|
| 50040_N_1 | HepG2     |               | uninfected | 46,351,735  | 95.3                            |
| 50043_N_1 | HepG2     |               | uninfected | 66,947,947  | 96.3                            |
| 50045_N_1 | HepG2     |               | uninfected | 57,453,983  | 97.1                            |
| 50046_N_1 | HepG2     |               | uninfected | 50,403,025  | 97.2                            |
| 50039_N_1 | HepG2     | early         |            | 44,059,588  | 93.1                            |
| 50044_N_1 | HepG2     | early         |            | 79,005,831  | 94.7                            |
| 50048_N_1 | HepG2     | mid           |            | 57,789,037  | 92.2                            |
| 50047_N_1 | HepG2     | mid           |            | 60,086,358  | 78.2                            |
| 50038_N_1 | HepG2     | mid           |            | 55,843,037  | 72.5                            |
| 50042_N_1 | HepG2     | mid           |            | 61,038,757  | 70.0                            |
| 50049_N_1 | HepG2     | late          |            | 60,041,207  | 47.0                            |
| 50041_N_1 | HepG2     | late          |            | 73,243,131  | 26.6                            |
| 50036_N_1 | HepG2     | late          |            | 55,577,831  | 20.1                            |
| 50009_N_1 | HuH7      |               | uninfected | 57,706,211  | 96.0                            |
| 50014_N_1 | HuH7      |               | uninfected | 72,568,339  | 96.1                            |
| 50030_N_1 | HuH7      |               | uninfected | 66,425,265  | 96.6                            |
| 50000_N_1 | HuH7      |               | uninfected | 56,048,512  | 96.8                            |
| 50025_N_1 | HuH7      |               | uninfected | 71,437,692  | 97.0                            |
| 50018_N_1 | HuH7      | early         |            | 51,736,339  | 94.9                            |
| 50001_N_1 | HuH7      | early         |            | 50,605,071  | 95.7                            |
| 50026_N_1 | HuH7      | early         |            | 61,250,321  | 90.9                            |
| 50019_N_1 | HuH7      | early         |            | 58,971,982  | 95.7                            |
| 50011_N_1 | HuH7      | early         |            | 47,436,418  | 97.2                            |
| 50002_N_1 | HuH7      | early         |            | 53,690,301  | 94.8                            |
| 50021_N_1 | HuH7      | early         |            | 68,197,956  | 93.7                            |
| 50027_N_1 | HuH7      | early         |            | 63,382,872  | 89.3                            |
| 50003_N_1 | HuH7      | early         |            | 51,968,890  | 92.9                            |
| 50005_N_1 | HuH7      | early         |            | 46,577,577  | 92.9                            |
| 50015_N_1 | HuH7      | mid           |            | 62,012,593  | 95.6                            |
| 50022_N_1 | HuH7      | mid           |            | 72,154,540  | 92.7                            |
| 50013_N_1 | HuH7      | mid           |            | 57,778,178  | 93.0                            |
| 50006_N_1 | HuH7      | mid           |            | 60,422,939  | 91.3                            |
| 50033_N_1 | HuH7      | mid           |            | 69,486,282  | 70.8                            |
| 50023_N_1 | HuH7      | mid           |            | 70,726,532  | 96.2                            |
| 50034_N_1 | HuH7      | late          |            | 72,209,410  | 37.8                            |
| 50007_N_1 | HuH7      | late          |            | 58,604,057  | 77.3                            |
| 50024_N_1 | HuH7      | late          |            | 74,274,913  | 95.3                            |
| 50035_N_1 | HuH7      | late          |            | 67,640,317  | 27.1                            |
| 50031_N_1 | HuH7      | late          |            | 86,027,190  | 32.3                            |
| 50008_N_1 | HuH7      | late          |            | 58,946,943  | 73.2                            |

\*early (2-12 hpi), mid (18-24 hpi), late (36-48 hpi)
